# Supplementary material for: MISF2 Encodes an Essential Mitochondrial Splicing Co-factor Required for nad2 mRNA Processing and Embryo Development in Arabidopsis thaliana
Source: Preprints.org preprint supplement (doi:10.20944/preprints202201.0113.v1), 2022-01-10
Supplement: Supplementary file 1 [file supplementary]

**Table S2.** List of antibodies used in this study.

| Antibody     | Protein I.D.                                               | origin                             | serum               | dilution | Reference / source                                          |
|--------------|------------------------------------------------------------|------------------------------------|---------------------|----------|-------------------------------------------------------------|
| AtpA         | Mitochondrial ATP-synthase subunit $\alpha$                | <i>Zea mays</i>                    | Mouse (monoclonal)  | 1/500    | Thomas Elthon collection, PM014                             |
| AtpB         | Mitochondrial ATP-synthase subunit $\beta$                 | <i>Zea mays</i>                    | Mouse (monoclonal)  | 1/5,000  | (Michael <i>et al.</i> 1993)                                |
| CA2          | $\gamma$ -carbonic anhydrase-like subunit 2                | <i>Arabidopsis thaliana</i>        | Rabbit (polyclonal) | 1/1,000  | (Perales <i>et al.</i> 2005, Sunderhaus <i>et al.</i> 2006) |
| Cox2         | Cytochrome oxidase subunit-2                               | <i>Arabidopsis thaliana</i>        | Rabbit (polyclonal) | 1/5,000  | Agrisera antibodies, AS04 053A                              |
| Nad1         | NADH-dehydrogenase complex subunit-1                       | <i>Arabidopsis thaliana</i>        | Rabbit (polyclonal) | 1/1000   | Gift of Dr. Etienne Meyer, Halle U.                         |
| Nad9         | NADH-dehydrogenase complex subunit-9                       | <i>Triticum spp.</i>               | Rabbit (polyclonal) | 1/50,000 | (Lamattina <i>et al.</i> 1993)                              |
| RISP         | Rieske iron-sulfur protein                                 | <i>Arabidopsis thaliana</i>        | Rabbit (polyclonal) | 1/5,000  | Gift of Prof. Ian Small, UWA                                |
| VDAC (PORIN) | Mitochondrial membrane-associated $\beta$ -barrel proteins | <i>Zea mays</i>                    | Mouse (monoclonal)  | 1/1000   | Thomas Elthon collection, PM035                             |
| AOX1/2       | Alternative oxidase                                        | <i>Sauromatum guttatum</i>         | Rabbit (polyclonal) | 1/500    | Agrisera antibodies, AS04 054                               |
| Nad6         | NADH-ubiquinone oxidoreductase chain 6                     | <i>Arabidopsis thaliana</i>        | Rabbit (polyclonal) | 1:1000   | Agrisera (AS15 2926)                                        |
| Cob          | Apocytochrome B                                            | <i>Beta vulgaris ssp. maritima</i> | Rabbit (polyclonal) | 1:4000   | Meyer et al. 2018                                           |
| CYTC1        | Cytochrome C1                                              | <i>Arabidopsis thaliana</i>        | Rabbit (polyclonal) | 1:1000   | Giégé et al. 2005                                           |
| CYTC         | Cytochrome C                                               | <i>Arabidopsis thaliana</i>        | Rabbit (polyclonal) | 1:1000   | Agrisera (AS08 343A)                                        |

## References

- Giege. P, Sweetlove LJ, Cognat V, Leaver CJ. 2005.** Coordination of nuclear and mitochondrial genome expression during mitochondrial biogenesis in Arabidopsis. *Plant cell*, **17**, 1497-1512.
- Lamattina, L., Gonzalez, D., Gualberto, J. and Grienenberger, J.-M.** (1993) Higher plant mitochondria encode an homologue of the nuclear-encoded 30-kDa subunit of bovine mitochondrial complex I. *Eur J Biochem*, **217**, 831-838.
- Meyer EH, Lehmann C, Boivin S, Brings L, De Cauwer I, Bock R, Kuhn K, Touzet P.** (2018) CMS-G from Beta vulgaris ssp. maritima is maintained in natural populations despite containing an atypical cytochrome c oxidase. *Biochem J*, **475**, 759–773.
- Michael, H.L., Arnost, H. and Elthon, T.E.** (1993) Monoclonal Antibodies to the a- and b- Subunits of the Plant Mitochondrial F<sub>1</sub>-ATPase. *Plant Physiology*, **101**, 931-937.
- Perales, M., Eubel, H., Heinemeyer, J., Colaneri, A., Zabaleta, E. and Braun, H.-P.** (2005) Disruption of a nuclear gene encoding a mitochondrial gamma carbonic anhydrase reduces complex I and supercomplex I+III2 levels and alters mitochondrial physiology in Arabidopsis. *J Mol Biol*, **350**, 263-277.
- Sunderhaus, S., Dudkina, N.V., Jansch, L., Klodmann, J., Heinemeyer, J., Perales, M., Zabaleta, E., Boekema, E.J. and Braun, H.P.** (2006) Carbonic anhydrase subunits form a matrix-exposed domain attached to the membrane arm of mitochondrial complex I in plants. *J Biol Chem*, **281**, 6482-6488.
