# Supplementary material for: MISF2 Encodes an Essential Mitochondrial Splicing Co-factor Required for nad2 mRNA Processing and Embryo Development in Arabidopsis thaliana
Source: Preprints.org preprint supplement (doi:10.20944/preprints202201.0113.v1), 2022-01-10
Supplement: Supplementary file 2 [file supplementary]

**Table S1.** List of oligonucleotides used in this study.

a. List of oligonucleotides used for the analysis of the mRNA profiles of wild type and mutant plants by RT-qPCR experiments.

| gene target    | oligo name     | sequence (5'-to-3')       |
|----------------|----------------|---------------------------|
| <i>AOX1A</i>   | <i>aox1aF</i>  | AGCATCATGTTCCAACGACGTTTC  |
|                | <i>aox1aR</i>  | GCTCGACATCCATATCTCCTCTGG  |
| <i>AOX1B</i>   | <i>aox1bF</i>  | GGACCGTGAAATCTCTTCGATGGC  |
|                | <i>aox1bR</i>  | TCTAGCATCATTGCTCTGCATCCG  |
| <i>AOX1C</i>   | <i>aox1cF</i>  | TCTTCCAGAGGAGGTATGGTTGCC  |
|                | <i>aox1cR</i>  | AGTGCATAAGCATCCCTCCAACC   |
| <i>AOX1D</i>   | <i>aox1dF</i>  | TTTGCTCGAAGAGGCTGAGAACG   |
|                | <i>aox1dR</i>  | CTCGTTCGTACCATTGGGTTGTG   |
| <i>AOX2</i>    | <i>aox2F</i>   | ACGGTGATTTCGTGCTGATGAAGC  |
|                | <i>aox2R</i>   | TCCTTGATTGCGAATGTCAGAAGC  |
| <i>NDA1</i>    | <i>nda1F</i>   | GTATCCAACCGCGATTTCACG     |
|                | <i>nda1R</i>   | AGTTACAGTCTCACAATGCACCTC  |
| <i>NDA2</i>    | <i>nda2F</i>   | TGGTGTGGTCTTCTCCTTTCG     |
|                | <i>nda2R</i>   | TCCATTTCGTCAATGCCAATCCTTC |
| <i>NDB1</i>    | <i>ndb1F</i>   | TAACACATTGGCACTCCTGGTG    |
|                | <i>ndb1R</i>   | CTCTGTGCATCCTCTACTTCCTTG  |
| <i>atp1</i>    | <i>atp1F</i>   | TCACTTCGACACGCTTTTGC      |
|                | <i>atp1R</i>   | GGAATGGCCTTGAATCTTGA      |
| <i>atp6</i>    | <i>atp6-1F</i> | TCTTTTGCGAGTCAATGCAC      |
|                | <i>atp6-1R</i> | TCTCGCGTATCTCACATTGC      |
| <i>atp8</i>    | <i>atp8F</i>   | CCGTCGACTTATTGGGAAAA      |
|                | <i>atp8R</i>   | TTCCTTGGCCATGTACAACA      |
| <i>atp9</i>    | <i>atp9F</i>   | CATTCCCTCTGACGTGCAAT      |
|                | <i>atp9R</i>   | TCGTCGATTCTTACCCTCGT      |
| <i>atp4</i>    | <i>atp4F</i>   | GGATCAGCTTGCGAATTTGT      |
|                | <i>atp4R</i>   | GCAAATTGCTTCCCCACTAA      |
| <i>ccmb</i>    | <i>ccmBF</i>   | TCTTGGAATCACATCCAGCA      |
|                | <i>ccmBR</i>   | CGAGACCGAAATTGGAAAAA      |
| <i>ccmc</i>    | <i>ccmCF</i>   | AGCTACGCGCAAATTCTCAT      |
|                | <i>ccmCR</i>   | GCCGTGGCGATATAAACAAT      |
| <i>ccmfc</i>   | <i>ccmFcF</i>  | CACATGGAGGAGTGTGCATC      |
|                | <i>ccmFcR</i>  | GTGGGTCCATGTAAATGATCG     |
| <i>ccmfn-1</i> | <i>ccmFN1F</i> | AGCTCTTGGCATTGCTTTGT      |
|                | <i>ccmFN1R</i> | AGTGCCACAATCCCATTCTAT     |
| <i>ccmfn-2</i> | <i>ccmFN2F</i> | CGTGTCGTTCTGTAATGGAAA     |
|                | <i>ccmFN2R</i> | TGATAAGCCCACCAACTTCC      |
| <i>cob</i>     | <i>cobF</i>    | TGCCGGAATGGTATTTCCTA      |
|                | <i>cobR</i>    | GCCAAAAGCAACCAAAACAT      |
| <i>cox1</i>    | <i>cox1F</i>   | GTAGCTGCGGTGAAGTAGGC      |
|                | <i>cox1R</i>   | CTGCCTGGATTTCGGTATCAT     |
| <i>cox2</i>    | <i>cox2F</i>   | TGATGCTGTACCTGGTTCGTT     |

|                       |                        |                             |
|-----------------------|------------------------|-----------------------------|
|                       | <i>cox2R</i>           | TGGGGGATTAATTGATTGGA        |
| <i>cox3</i>           | <i>cox3F</i>           | CCGTAACTTGGGCTCATCAT        |
|                       | <i>cox3R</i>           | AAACCATGAAAGCCTGTTGC        |
| <i>mttb</i>           | <i>mttBF</i>           | GGGGTCTTTCTTTGGAAACC        |
|                       | <i>mttBR</i>           | TCTCCCTCATTCCACTCGTC        |
| <i>nad1 exons a-b</i> | <i>nad1 1-2F</i>       | GACCAATAGATACTTCATAAGAGACCA |
|                       | <i>nad1 1-2R</i>       | TTGCCATATCTTCGCTAGGTG       |
| <i>nad1 exons b-c</i> | <i>nad1 2-3F</i>       | ATTCAGCTTCCGCTTCTGG         |
|                       | <i>nad1 2-3R</i>       | TCTGCAGCTCAAATGGTCTC        |
| <i>nad1 exons c-d</i> | <i>nad1 3-4F</i>       | AAAAGAGCAGACCCCATTTGA       |
|                       | <i>nad1 3-4R</i>       | TCCGTTTGATCTCCCAGAAG        |
| <i>nad1 exons d-e</i> | <i>nad1 4-5F</i>       | AGCCCGGGATCTTCTTGA          |
|                       | <i>nad1 4-5R</i>       | TCTCAATGGGGTCTGCTC          |
| <i>nad2 exons a-b</i> | <i>nad2 exons a-bF</i> | GCGAGCAGAAGCAAGGTTAT        |
|                       | <i>nad2 exons a-bR</i> | GGATCCTCCCACACATGTTT        |
| <i>nad2 exons b-c</i> | <i>nad2 exons b-cF</i> | AAAGGAACTGCAGTGATCTTGA      |
|                       | <i>nad2 exons b-cR</i> | AATATTTGATCTTAGGTGCATTTTC   |
| <i>nad2 exons c-d</i> | <i>nad2 exons c-dF</i> | GCGCAATAGAAAGGAATGCT        |
|                       | <i>nad2 exons c-dR</i> | CTATGGGTCTACTGGAGCTACCC     |
| <i>nad2 exons d-e</i> | <i>nad2 exons d-eF</i> | CAAAGGAGAGGGGTATAGCAA       |
|                       | <i>nad2 exons d-eR</i> | TATTGTCTCTCGCCGCTTT         |
| <i>nad3</i>           | <i>nad3F</i>           | CGAATGTGGTTTCGATCCTT        |
|                       | <i>nad3R</i>           | GCACCCCTTTTCCATTGATA        |
| <i>nad4 exons a-b</i> | <i>nad4 exons a-bF</i> | ATTCTATGTTTTTCCCGAAAGC      |
|                       | <i>nad4 exons a-bR</i> | GAAAAACTGATATGCTGCCTTG      |
| <i>nad4 exons b-c</i> | <i>nad4 exons b-cF</i> | AATACCCATGTTTCCCGAAG        |
|                       | <i>nad4 exons b-cR</i> | TGCTACCTCCAATTCCTGT         |
| <i>nad4 exons c-d</i> | <i>nad4 exons c-dF</i> | TTCCCTCCATAAATTCTCCGATT     |
|                       | <i>nad4 exons c-dR</i> | TGAAATTTGCCATGTTGCAC        |
| <i>nad4L</i>          | <i>nad4L-F</i>         | GGGGAATCCTCCTTAATAGACG      |
|                       | <i>nad4L-R</i>         | AACGAAAATGGCTAACCCAATA      |
| <i>nad5 exons a-b</i> | <i>nad5 exons a-bF</i> | TGGACCAAGCTACTTATGGATG      |
|                       | <i>nad5 exons a-bR</i> | CCATGGATCTCATCGGAAAT        |
| <i>nad5 exons b-c</i> | <i>nad5 exons b-cF</i> | TACCTAAACCAATCATCATATC      |
|                       | <i>nad5 exons b-cR</i> | CTGGCTCTCGGGAGTCTCTT        |
| <i>nad5 exons c-d</i> | <i>nad5 exons c-dF</i> | AACTCGGATTCGGCAAGAA         |
|                       | <i>nad5 exons c-dR</i> | GATATGATGATTGGTTTAGGTA      |
| <i>nad5 exons d-e</i> | <i>nad5 exons d-eF</i> | AACATTGCAAAGGCATAATGA       |
|                       | <i>nad5 exons d-eR</i> | GTTCTCGGTTTCGGATATG         |
| <i>nad6</i>           | <i>nad6F</i>           | TATGCCGGAAGGTACGAAG         |
|                       | <i>nad6R</i>           | GTGAGTGGGTCAGTCGTCCT        |
| <i>nad7 exons a-b</i> | <i>nad7 exons a-bF</i> | ACCTCAACATCCTGCTGCTC        |
|                       | <i>nad7 exons a-bR</i> | AAGGTAAAGCTTGAAGATAAGTTTTGT |
| <i>nad7 exons b-c</i> | <i>nad7 exons b-cF</i> | GAGGGACTGAGAAATTAATAGAGTACA |
|                       | <i>nad7 exons b-cR</i> | TGGTACCTCGCAATTCAAAA        |
| <i>nad7 exons c-d</i> | <i>nad7 exons c-dF</i> | ACTGTCACTGCACAGCAAGC        |
|                       | <i>nad7 exons c-dR</i> | CATTGCACAATGATCCGAAG        |

|                                    |                        |                          |
|------------------------------------|------------------------|--------------------------|
| <i>nad7</i> exons d-e              | <i>nad7</i> exons d-eF | GATCAAAGCCGATGATCGTAA    |
|                                    | <i>nad7</i> exons d-eR | AGGTGCTTCAACTGCGGTAT     |
| <i>nad9</i>                        | <i>nad9F</i>           | GGATGACCCTCGAAACCATA     |
|                                    | <i>nad9R</i>           | CACGCATTCTGTACAAACC      |
| <i>rpl2</i>                        | <i>rpl2F</i>           | CCGAAGACGGATCAAGGTAA     |
|                                    | <i>rpl2R</i>           | CGCAATTCATCACCATTTTG     |
| <i>rpl5</i>                        | <i>rpl5F</i>           | AAGGGGTTCGACAGGAAAGT     |
|                                    | <i>rpl5R</i>           | CGTATTTTCGACCGGAAAATC    |
| <i>rpl16</i>                       | <i>rpl16F</i>          | GAGCATTTGCCAAACTCACA     |
|                                    | <i>rpl16R</i>          | CGGACACTTTCATCGTGCTA     |
| <i>rps3</i>                        | <i>rps3F</i>           | CCGATTTTCGGTAAGACTTGG    |
|                                    | <i>rps3R</i>           | AGCCGAAGGTGAGTCTCGTA     |
| <i>rps4</i>                        | <i>rps4F</i>           | ACCCATCACAGAGATGCACA     |
|                                    | <i>rps4R</i>           | TCACACAAACCCTTCGATGA     |
| <i>rps7</i>                        | <i>rps7F</i>           | CTCGAACTGAACGCGATGTA     |
|                                    | <i>rps7R</i>           | AAGCTGCTTCAAGGATCCAA     |
| <i>rps12</i>                       | <i>rps12F</i>          | AGCCAAAGTACGGTTGAGCA     |
|                                    | <i>rps12R</i>          | TTTGGGTTTTTCTGCACCAT     |
| <i>matR</i>                        | <i>matR-F</i>          | AATTTTTGCGAGAGCTGGAA     |
|                                    | <i>matR-R</i>          | TTGAACCCCGTCTGTAGAC      |
| <i>rrn18</i>                       | <i>rrn18F</i>          | CGTCACCTGGGTCAAAAACCT    |
|                                    | <i>rrn18R</i>          | GCTTGAAAACCGAAGTGAGC     |
| <i>rrn26</i>                       | <i>rrn26F</i>          | GACGAGACTTTCGCCTTTTG     |
|                                    | <i>rrn26R</i>          | CTTGGAGCGAATTGGATGAT     |
| <i>rrn5</i>                        | <i>rrn5F</i>           | CCGACCTCGATATGTGGAATCGTC |
|                                    | <i>rrn5R</i>           | TGGACCATGTCTCCCGAACAATC  |
| <i>18S rRNA</i><br>(nuclear)       | <i>18S nucl-F</i>      | AAACGGCTACCACATCCAAG     |
|                                    | <i>18S nucl-R</i>      | ACTCGAAAGAGCCCGGTATT     |
| <i>actin2</i> (At3g18780, nuclear) | <i>actin2-F</i>        | GGTAACATTGTGCTCAGTGGTGG  |
|                                    | <i>actin2-R</i>        | AACGACCTTAATCTTCATGCTGC  |
| <i>GAPDH</i>                       | <i>GAPDH-F</i>         | TCTCGATCTCAATTCGCAAAA    |
|                                    | <i>GAPDH-R</i>         | CGAAACCGTTGATTCCGATTC    |

b. List of oligonucleotides used for the analysis of the splicing profiles of wild type and mutant plants by RT-qPCR experiments.

| Gene                       | Forward primer              | Reverse primer        |
|----------------------------|-----------------------------|-----------------------|
| <i>rpl2</i>                | CCGAAGACGGATCAAGGTAA        | CGCAATTCATCACCATTTTG  |
| <i>rpl2</i> intron exon2   | TTAGGAAGAGCCGTACGAGG        | CGCAATTCATCACCATTTTG  |
| <i>rps3</i>                | AGCCGAAGGTGAGTCTCGTA        | CCGATTTTCGGTAAGACTTGG |
| <i>rps3</i> intron1 exon2  | AGCCGAAGGTGAGTCTCGTA        | TCTACGGCGGGGTCACTAT   |
| <i>cox2</i>                | TGGGGGATTAATTGATTGGA        | TGATGCTGTACCTGGTCGTT  |
| <i>cox2</i> intron1 exon2  | TGGGGGATTAATTGATTGGA        | AGCAGTACGAGCTGAAAGGC  |
| <i>ccmFc</i>               | GTGGGTCCATGTAAATGATCG       | CACATGGAGGAGTGTGCATC  |
| <i>ccmFc</i> intron1 exon1 | CCCGGATCGAATCAGAGTT         | CACATGGAGGAGTGTGCATC  |
| <i>nad1</i> exon1-2        | GACCAATAGATACTTCATAAGAGACCA | TTGCCATATCTTCGCTAGGTG |
| <i>nad1</i> intron1 exon2  | GACCAATAGATACTTCATAAGAGACCA | CGTGCTCGTACGGTTCATAG  |
| <i>nad1</i> exon2-3        | ATTCAGCTTCCGCTTCTGG         | TCTGCAGCTCAAATGGTCTC  |

|                           |                             |                            |
|---------------------------|-----------------------------|----------------------------|
| <i>nad1</i> intron2 exon2 | GGTTGGGTTAGGGGAACATC        | TCTGCAGCTCAAATGGTCTC       |
| <i>nad1</i> exon3-4       | AAAAGAGCAGACCCCATTTGA       | TCCGTTTGATCTCCCAGAAG       |
| <i>nad1</i> intron3 exon4 | AAAAGAGCAGACCCCATTTGA       | GGGAGCTGTATGAGCGGTAA       |
| <i>nad1</i> exon4-5       | AGCCCGGGATCTTCTTGA          | TCTTCAATGGGGTCTGCTC        |
| <i>nad1</i> intron4 exon5 | AGCCCGGGATCTTCTTGA          | ACGGAGCTGCATCCCTACT        |
| <i>nad2</i> exon1-2       | GCGAGCAGAAGCAAGTTAT         | GGATCCTCCCACACATGTTT       |
| <i>nad2</i> intron1 exon2 | GCGAGCAGAAGCAAGTTAT         | CCCATTCCTAACCAAGTGGAG      |
| <i>nad2</i> exon2-3       | AAAGGAACTGCAGTGATCTTGA      | AATATTTGATCTTAGGTGCATTTTC  |
| <i>nad2</i> intron2 exon2 | CCCGATCCGATAGTTTACAA        | AATATTTGATCTTAGGTGCATTTTC  |
| <i>nad2</i> exon3-4       | GCGCAATAGAAAGGAATGCT        | CTATGGGTCTACTGGAGCTACCC    |
| <i>nad2</i> intron3 exon4 | GCGCAATAGAAAGGAATGCT        | GGCGAATTTCAAACCTTGTTG      |
| <i>nad2</i> exon4-5       | CAAAGGAGAGGGGTATAGCAA       | TATTTGTTCTTCGCCGCTTT       |
| <i>nad2</i> intron4 exon4 | CTTATTCGTGGCAACCTTCC        | TATTTGTTCTTCGCCGCTTT       |
| <i>nad4</i> exon1-2       | ATTCTATGTTTTTCCCGAAAGC      | GAAAAACTGATATGCTGCCTTG     |
| <i>nad4</i> intron1 exon2 | CCGTATGATGCGGAAGTCTC        | GAAAAACTGATATGCTGCCTTG     |
| <i>nad4</i> exon2-3       | AATACCCATGTTTCCCGAAG        | TGCTACCTCCAATTCCCTGT       |
| <i>nad4</i> intron2 exon3 | GCGGAACGACCAGAAAAATA        | TGCTACCTCCAATTCCCTGT       |
| <i>nad4</i> exon3-4       | TTCTCCATAAATTCTCCGATT       | TGAAATTTGCCATGTTGCAC       |
| <i>nad4</i> intron3 exon4 | TCTAGCTTGGTTCCGAGAGC        | TGAAATTTGCCATGTTGCAC       |
| <i>nad5</i> exon1-2       | TGGACCAAGCTACTTATGGATG      | CCATGGATCTCATCGGAAAT       |
| <i>nad5</i> intron1 exon2 | TGGACCAAGCTACTTATGGATG      | TTCGCAAATAGGTCCGACT        |
| <i>nad5</i> exon2-3       | TACCTAAACCAATCATCATATC      | CTGGCTCTCGGGAGTCTCTT       |
| <i>nad5</i> intron2-exon2 | GTACGATCGTGTCGGGTGA         | CTGGCTCTCGGGAGTCTCTT       |
| <i>nad5</i> exon3-4       | AACTCGGATTCGGCAAGAA         | GATATGATGATTGGTTTAGGTA     |
| <i>nad5</i> intron3-exon4 | AACTCGGATTCGGCAAGAA         | GCCGTGTAATAGGCGACCA        |
| <i>nad5</i> exon4-5       | AACATTGCAAAGGCATAATGA       | GTTCTGCGTTTCGGATATG        |
| <i>nad5</i> intron4 exon5 | AACATTGCAAAGGCATAATGA       | CCTGTAAACCCCATGATGT        |
| <i>nad7</i> exon1-2       | ACCTCAACATCCTGCTGCTC        | AAGGTAAAGCTTGAAGATAAGTTTGT |
| <i>nad7</i> intron1 exon2 | ACGGTTTTTAGGGGGATCTG        | AAGGTAAAGCTTGAAGATAAGTTTGT |
| <i>nad7</i> exon2-3       | GAGGGACTGAGAAATTAATAGAGTACA | TGGTACCTCGCAATTCAAAA       |
| <i>nad7</i> intron2 exon3 | AGTGGGAGAGCCGTGTTATG        | TGGTACCTCGCAATTCAAAA       |
| <i>nad7</i> exon3-4       | ACTGTCACTGCACAGCAAGC        | CATTGCACAATGATCCGAAG       |
| <i>nad7</i> intron3 exon4 | TAAAGTGAAGTGTTGGGCCT        | CATTGCACAATGATCCGAAG       |
| <i>nad7</i> exon4-5       | GATCAAAGCCGATGATCGTAA       | AGGTGCTTCAACTGCGGTAT       |
| <i>nad7</i> intron4 exon5 | CGGCCAAATGACTACAGGAT        | AGGTGCTTCAACTGCGGTAT       |

c. List of oligonucleotides used for the analysis of the splicing profiles of wild type and mutant plants by RT-qPCR experiments.

| Gene                                                      | Forward primer                                                   | Reverse primer                                                 |
|-----------------------------------------------------------|------------------------------------------------------------------|----------------------------------------------------------------|
| <i>misf2</i> (AT3G22670)                                  | ATGCTCACTAAGCTTAGGATTA                                           | ATTATAAGTATGACCTGAATGCA                                        |
| <i>misf2.1</i> (SALK_067654)                              | ATTTTGCCGATTTTCGGAAC                                             | ATTATAAGTATGACCTGAATGCA                                        |
| <i>misf2.2</i> (SALK_066141)                              | ATTTTGCCGATTTTCGGAAC                                             | ATTATAAGTATGACCTGAATGCA                                        |
| <i>misf2-GFP</i><br>( <i>misf2</i> -B1+ <i>misf2</i> -B2) | GGGGACAAGTTTGTACAAAAAAGC<br>AGGCTAAAATGCTCACTAAGCTTAG<br>GATTAGT | GGGGACCACTTTGTACAAGAAAG<br>CTGGGTCAAGCGTAACAAGCTTA<br>GATTCTTC |
