# Supplementary material for: MISF2 Encodes an Essential Mitochondrial Splicing Co-factor Required for nad2 mRNA Processing and Embryo Development in Arabidopsis thaliana
Source: Preprints.org preprint supplement (doi:10.20944/preprints202201.0113.v1), 2022-01-10
Supplement: Supplementary file 3 [file supplementary]

a

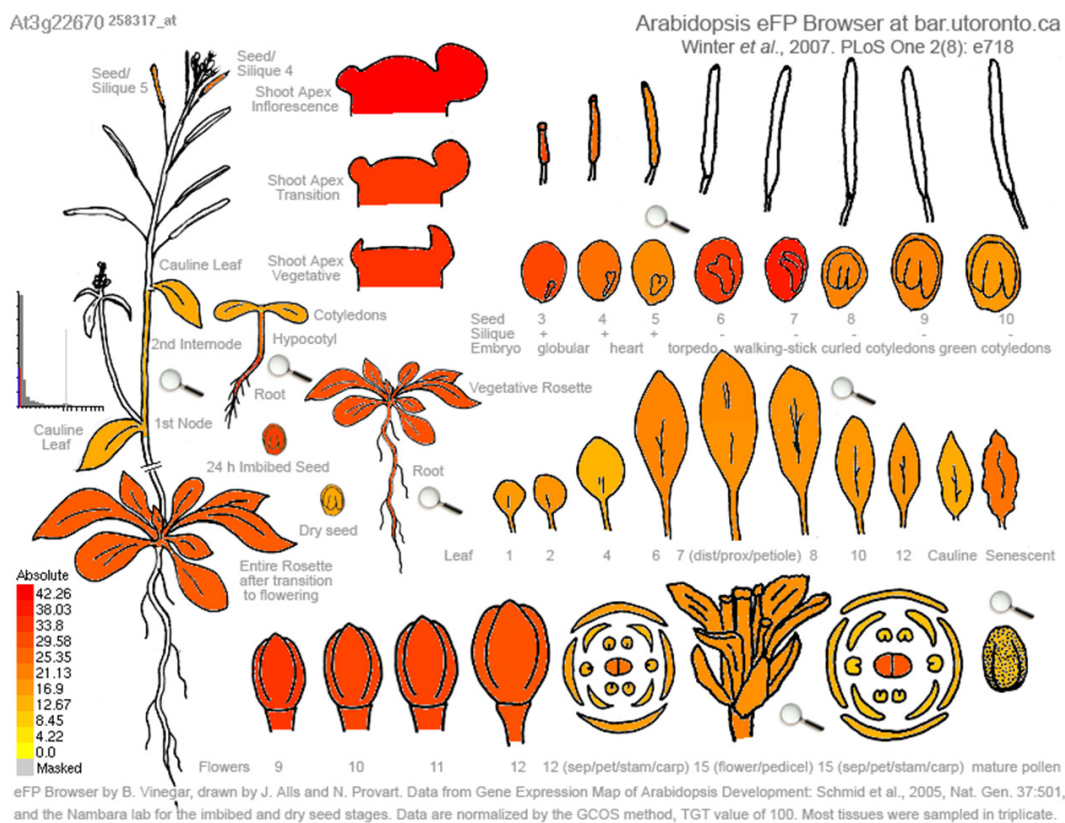

b

**Dataset:** 10 developmental stages from data selection: AT\_AFFY\_ATH1-0

Showing 1 measure(s) of 1 gene(s) on selection: MSP2

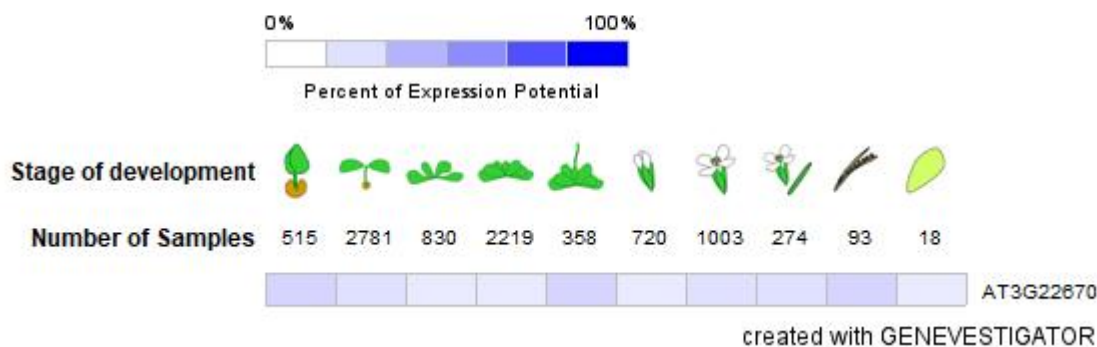

**Figure S2.** MISF2 gene expression pattern during Arabidopsis development. The expression pattern of MISF2 was analyzed using publicly available microarray and high-throughput RNAseq databases, including (a) 'The Arabidopsis Information Resource' (TAIR; <http://www.arabidopsis.org>), and (b) 'Genevestigator analysis toolbox' database (Hruz et al. 2008, Zimmermann et al. 2004).
