# Supplementary material for: MISF2 Encodes an Essential Mitochondrial Splicing Co-factor Required for nad2 mRNA Processing and Embryo Development in Arabidopsis thaliana
Source: Preprints.org preprint supplement (doi:10.20944/preprints202201.0113.v1), 2022-01-10
Supplement: Supplementary file 5 [file supplementary]

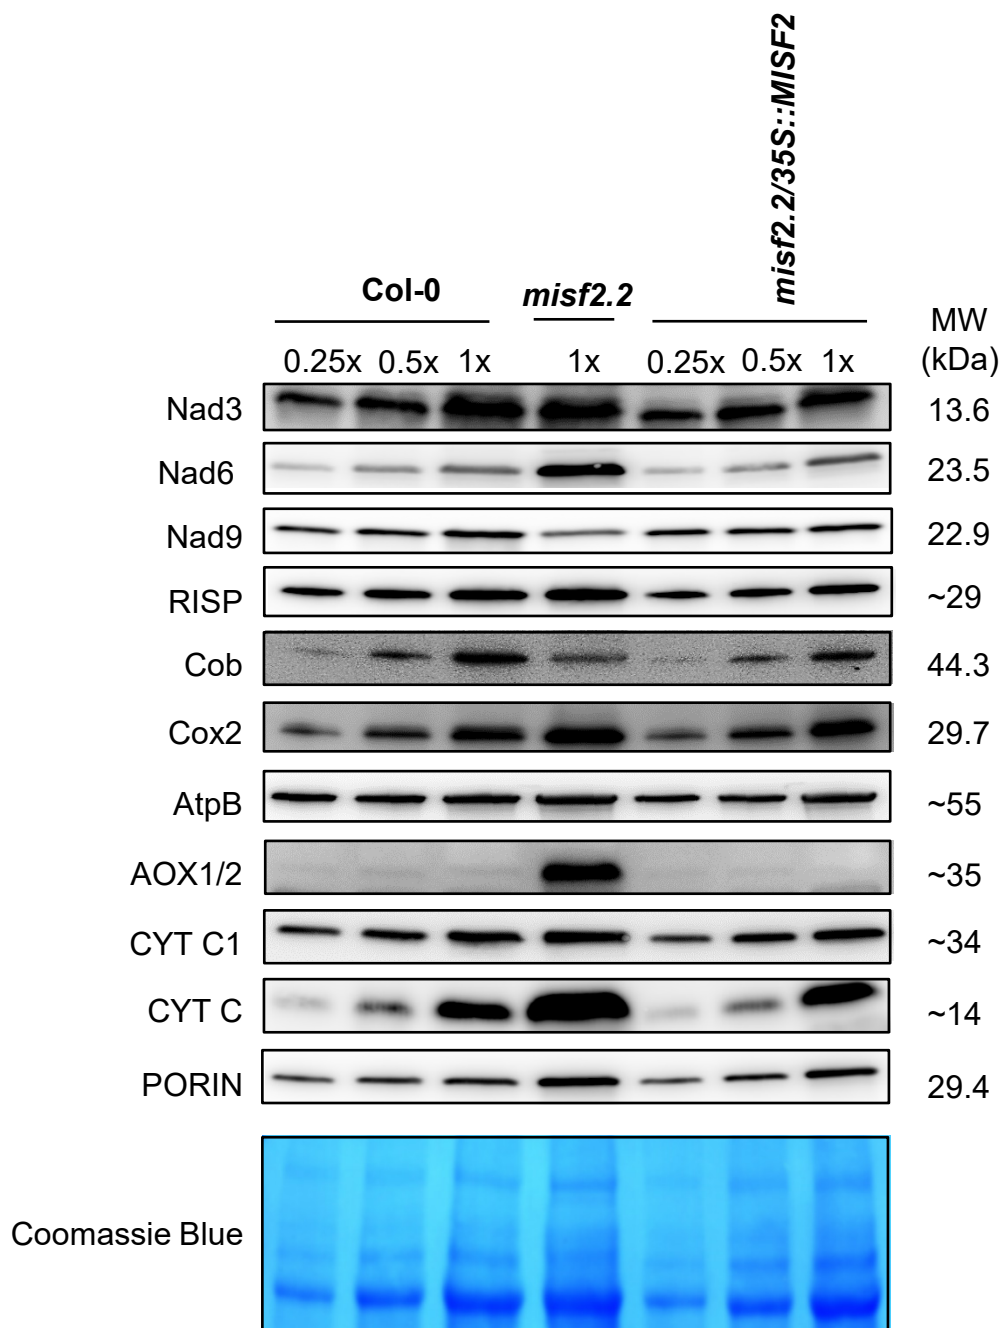

**Figure S4.** Steady-state level analysis of various mitochondrial proteins in wild type, *misf2.2* and functionally complemented *misf2.2* plants. Immunoblots performed with total proteins extracted from 3-week-old MS-grown wild type plants, rescued *misf2.1* plantlets, and complemented *misf2.2:35S-MISF2* plants. The blots were probed with polyclonal antibodies raised against the indicated mitochondrial proteins. Dilution series of proteins extracted from wild type and complemented plants were loaded for signal comparison with *misf2.1* extracts. Detection was carried out by chemiluminescence assays after incubation with HRP-conjugated secondary antibody. The original SDS-PAGE, following Coomassie-blue staining, is indicated below the immunoblot panels.
