# Supplementary material for: MISF2 Encodes an Essential Mitochondrial Splicing Co-factor Required for nad2 mRNA Processing and Embryo Development in Arabidopsis thaliana
Source: Preprints.org preprint supplement (doi:10.20944/preprints202201.0113.v1), 2022-01-10
Supplement: Supplementary file 6 [file supplementary]

**a**

**AT3G22670 (MISF2) gene structure**

5'...ggtcactgtcgcagcagtttagattttgacggcgtagaaaagcagaaaggtacgaagacgatgaccacacgaggttccttaaaa  
ttaggggttttttagaggaagaagacgaagagaatgacttgtacacgtgtcagtaaaaatcgtcacttgtcagatgtggggtaaac  
caaaaatctaaacgctaaattaaattaaatcgaaccgggggtgtaccaattaacgaaccgacccgacccggcacaagcagcaa  
gcttttaggtctaaaagatttcgaactttgatcggaaaaacaggagagaagtctgcgttttagattcaaacggaacaaaATCCTCAC  
TAAGCTTAGGATTAGTAAGCTTGTTCGTATACTTTACCTCGGAGAATCTTCCAACGGAGGTTTCTGGTAACGAATAACACTGC  
AGAGGAGTCGCCGATTGTTGCCGCAGAGTCACCGGAGCTACCGTCTTGGATTAAAGACTTTCTATCAAACAAGCCTTCTTCTTC  
ATCGAGTTCGGTTTCCAAAGATGATGAAGATTTTGTATCCCTTCTTTGGCGAATTGGGTCGAGAGCCAGAAAGTTTAGTCGTCA  
ACAAGTCTCAGAGGGAATGTAGTGAAGAAACCACTGGAAGATATTGATAAAGTTTGCGACTTT←SALK\_067654TTGAATA  
AGAAGGACACGTCTCATGA←SALK\_066141GGATGTTGTAAAGAGTTGAGTAAATGCGATGTGGTGGTTACAGAGAGTTTG  
GTTTTGCAAGTTCTAAGAAGGTTTAGTAATGGTTGGAATCAAGCTTACGGGTTTTTTCATTTGGGCAAATTCACAAACAGGTTAT  
GTGCATTTCAGGTCATACTTATAATGCAATGGTTGATGTGTGGGGAAATGTAGGAATTTTGATTTGATGTGGGAATTAGTCAAT  
GAGATGAACAAGAATGAAGAATCTAAGCTTGTACGCTTGATACGATGAGTAAGGTTATGAGGAGATTGGCCAAGTCAGGGAAA  
TATAATAAAGCTGTTGATGCTTTTTTTAGAGATGGAGAAGAGTTATGGTGTGAAAACAGATACTATTGCTATGAACAGTTTGATG  
GATGCACTTGTGAAAGAGAATAGTATAGAGCATGCTCATGAAGTTTTTCTGAAGCTTTTCGATACAATCAAGCCGGATGCGCGG  
ACATTC AACATTTTGATTACAGGTTTTTTGTAAAGCTCGGAAATTTGATGATGCTAGAGCGATGATGGATTTGATGAAGGTTACT  
GAGTTCACCTCTGATGTTGTTACTTACACTAGCTTTGTGGAAGCTTATTGCAAGGAAGGGGATTTTAGGAGGGTTAATGAAATG  
TTGGAAGAGATGCGAGAGAATGGGTGTAATCCTAATGTTGTGACTTATACTATTGTGATGCATTCTTTGGGTAAATCTAAACAA  
GTAGCTGAAGCTTTAGGAGTGATGAGAAGATGAAAGAAGATGGTTGTGTTCCTGATGCTAAGTTTTATAGCTCATTGATACAT  
ATTTTGTGCAAGACTGGTAGGTTTTAAGGATGCAGCTGAGATATTTGAGGACATGACGAATCAAGGAGTTCGTCTGTGATGTTTTTA  
GTCTACAATACCATGATTTCCGCTGCGCTTCATCACTCACGAGATGAGATGGCTCTACGTTTGCTTAAAAGGATGGAGGATGAG  
GAGGGGGAATCATGTAGTCCAAACGTTGAGACTTATGCTCCATTGTTGAAGATGTGTTGCCATAAGAAGAAAAATGAAGCTACTT  
GGAATATTATTGCATCACATGGTGAAAAACGATGTTAGTATCGATGTTTCGACATATATTCTTCTCATTAGAGGGTTATGTATG  
AGCGGGAAAGTTGAAGAAGCTTGCTTGTCTTTGAGGAAGCAGTACGAAAAGGAATGGTTCCTAGAGATAGCACTTGCAAAAATG  
TTGGTAGATGAGCTTGAGAAGAAAAATATGGCAGAAGCAAACTCAAGATTCAGAGTTTGGTTCAATCGAAAACAATGATTGAT  
TCTCACAGTCCTTTATCTGTTTCG←TAGagatttagagttttggagccttggctcaaagttttgttttcctttctgttgaatgata  
ctcttatactatgtttagatctcaaatacatgtgacctttactaaaaatgaaatgaatcaatttgtcacaaagttttcatgtctt...3'

**b**

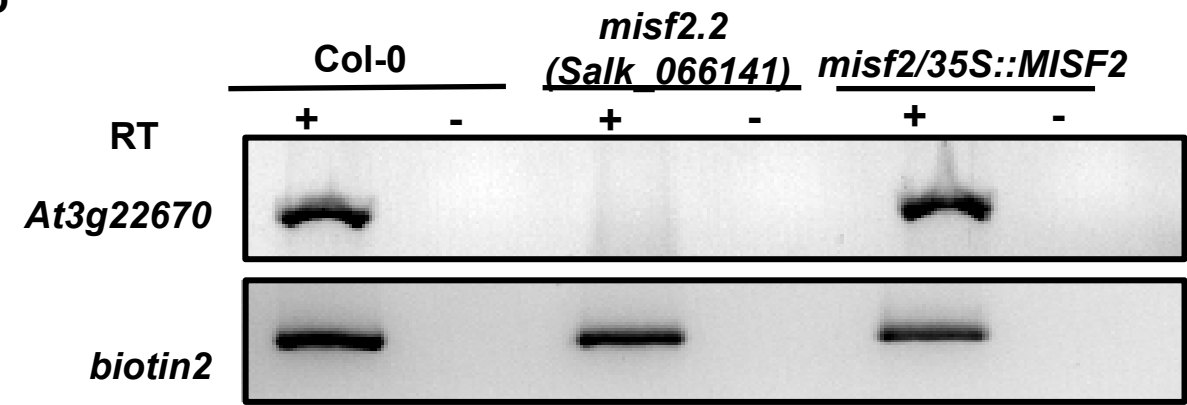

**Figure S3.** Nucleotide sequence of the MISF2 gene and precise location of T-DNA insertion site. (a) Nucleotide sequence of MISF2, encoded by the At3g22670 gene-locus. Lowercase letters indicate 5' and 3' untranslated regions (UTRs), as revealed by RACE analysis and the TAIR database, while uppercase letters correspond to the MISF2 open reading frame. Positions of T-DNA insertions in *misf2.1* (SALK-067654) and *misf2.2* (SALK-066141) lines are indicated. (b) RT-PCR analysis monitoring the expression of MISF2 in wild type (Col-0), homozygous *misf2.2* mutants (*Salk\_066141*) and functionally complemented *misf2.2* plants (*misf2/35S::MISF2*).
