# Supplementary material for: MISF2 Encodes an Essential Mitochondrial Splicing Co-factor Required for nad2 mRNA Processing and Embryo Development in Arabidopsis thaliana
Source: Preprints.org preprint supplement (doi:10.20944/preprints202201.0113.v1), 2022-01-10
Supplement: Supplementary file 7 [file supplementary]

Archive with 6 entries (6 files):
- Fig. S1- The topology and structure of MISF2 protein.pdf
- Fig. S2 -MISF2 expression tissue.pdf
- Fig. S3 -MISF2 gene structure_T-DNA.pdf
- Fig. S4 -SDS-PAGE compl.pdf
- Table S1 - qPCR primers.pdf
- Table S2 -antibodies.pdf
